# Supplementary material
Source: PubMed Central journal article supplement (PMC6040184)
Supplement: JB.00032-18_zjb999094749s1.pdf [file JB.00032-18_zjb999094749s1.pdf]

**Natural transformation in *Vibrio parahaemolyticus*:  
rapid method to create genetic deletions**

Suneeta Chimalapati<sup>1,2</sup>, Marcela de Souza Santos<sup>2</sup>, Kelly Servage<sup>1,2</sup>, Nicole J. De Nisco<sup>1,2</sup>  
Ankur B. Dalia<sup>3</sup> & Kim Orth<sup>1,2,4\*</sup>

**Supplemental material**

**Supplemental table 1. Primers used in this study**

| <b>Primer name</b> | <b>Sequence (5' 3')</b>                             |
|--------------------|-----------------------------------------------------|
| EpsD1kb_UpF1 (A)   | GCGTTTAGAGCTAAGTGCAGG                               |
| EpsD_UpR1          | GAAAGTTGGAACCTCTTACGTGCCGATCAGTATGTCTCCCTGAACTTACGC |
| EpsD_DownF1        | GATGAGTGGCAGGGCGGGGCGTAAATGGTAGATATGTTAGACACTGCG    |
| EpsD1kb_DownR1 (B) | GTAAGATCGCACGTAGACCAC                               |
| EpsD3kb_UpF1       | CTAATTCAGTAACCACACCGCG                              |
| EpsD3kb_DownR1     | CTAGACCTTGGTCTGTCGTTG                               |
| EpsDF (C)          | ATCG GTGAAACATTGGTTTAGCAA                           |
| EpsDR (D)          | ATCG TTAGTTCTTTTCCATTTGATCG                         |
| CatF (E)           | TGATCGGCACGTAAGAGGTTCCAACCTTTCACC                   |
| CatR (F)           | TTACGCCCCGCCCTGCCACTCATC                            |
| SacBF              | GCATGGATCCCACATATACCTGCCGTTCACTATT                  |
| SacBR              | ATCGCTGCAGTTATTTGTTAACTGTTAATTGTCCTTG               |
| KanF (G)           | GCACAACAGACAATCGGCTG                                |
| KanR (H)           | CGATACCGTAAAGCACGAG                                 |

Letters in parentheses indicate the primer designation used in Figure 3.
